arthroscopic shoulder surgery based on a suprascapular nerve block and an axillary nerve block: An evaluation of the first results. *Arthroscopy* 2008; 24:689–96

13. Price DJ: The shoulder block: A new alternative to interscalene brachial plexus blockade for the control of postoperative shoulder pain. *Anaesth Intensive Care* 2007; 35:575–81

## ANESTHESIOLOGY REFLECTIONS FROM THE WOOD LIBRARY-MUSEUM

### Opening Medallion from Portugal's Museu de Anestesiologia

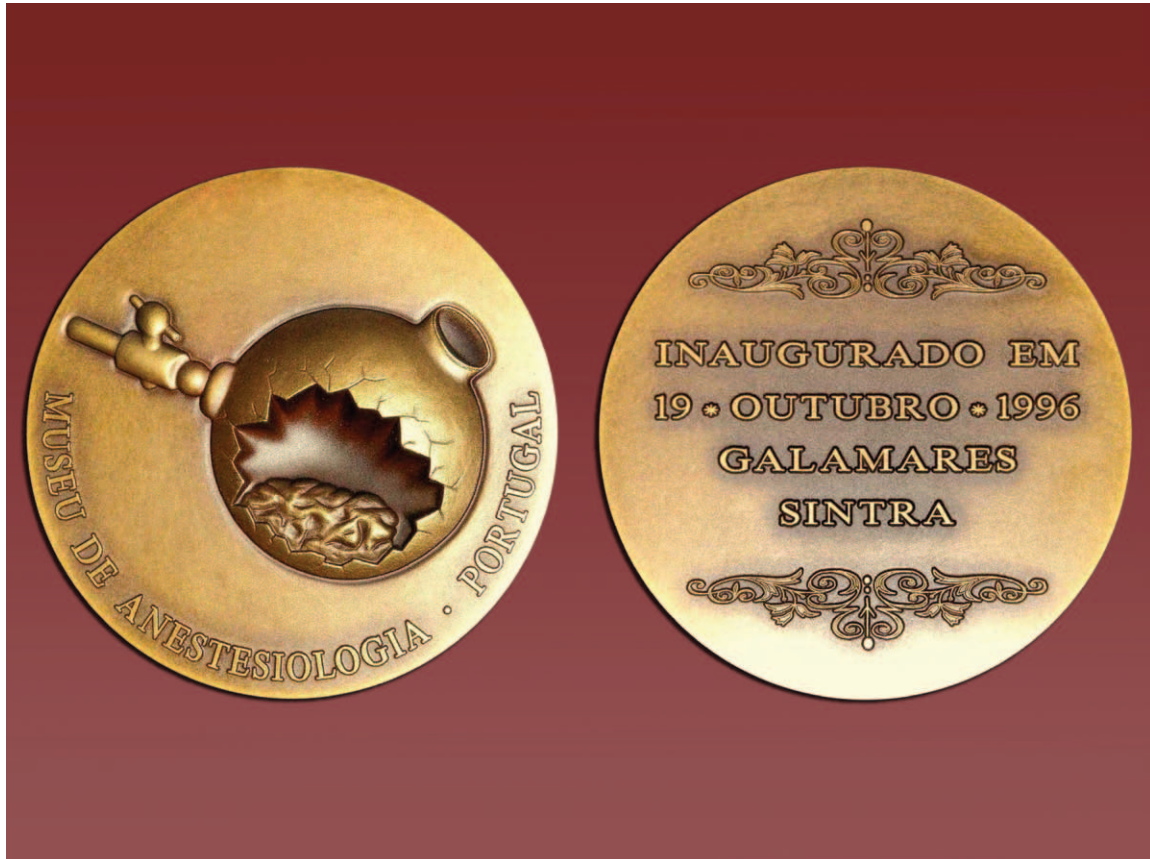

As part of its opening festivities, Portugal's Museum of Anesthesiology issued this attractive medallion. Depicting a Morton Ether Inhaler, the obverse (*left*) reads: "MUSEU DE ANESTESIOLOGIA/PORTUGAL." Note the opening artistically designed into the inhaler for peering through the "broken globe" at the ether-laden sponge inside. The medallion's reverse (*right*) reads: "INAUGURADO EM/19 OUTUBRO 1996/GALAMARES/SINTRA" (Portuguese for: "Inaugurated on 19 October 1996, Galamares, Sintra"). *ANESTHESIOLOGY* readers who are touring Lisbon are certainly encouraged to visit Portugal's Museum of Anesthesiology. (Copyright © the American Society of Anesthesiologists, Inc.)

*George S. Bause, M.D., M.P.H., Honorary Curator, ASA's Wood Library-Museum of Anesthesiology, Park Ridge, Illinois, and Clinical Associate Professor, Case Western Reserve University, Cleveland, Ohio. UJYC@aol.com.*
